# Supplementary material
Source: MDPI journal article supplement (https://www.mdpi.com/search?q=sensors-17-02536)
Supplement: s001 [file sensors-17-02536-s001.pdf]

## SUPPORTING INFORMATION

# All-Solid-State Sodium Selective Electrode with a Solid Contact of Chitosan/Prussian blue Nanocomposite

Tanushree Ghosh<sup>1,2,3</sup>, Hyun-Joong Chung<sup>1,\*</sup>, Jana Rieger<sup>2,3,\*</sup>

<sup>1</sup>Department of Chemical and Materials Engineering, Faculty of Engineering, Department of Chemical and Materials Engineering, University of Alberta, Edmonton, Alberta, Canada.

<sup>2</sup>Institute for Reconstructive Sciences in Medicine (iRSM), Misericordia Community Hospital, Edmonton, Alberta, Canada, Canada.

<sup>3</sup>Department of Communication Sciences and Disorders, Faculty of Rehabilitation Medicine, University of Alberta, Edmonton, Alberta, Canada.

\* Corresponding Authors: [chung.hj13@ualberta.ca](mailto:chung.hj13@ualberta.ca) (HJC) and [jana.rieger@ualberta.ca](mailto:jana.rieger@ualberta.ca) (JR)

Supplementary Figure

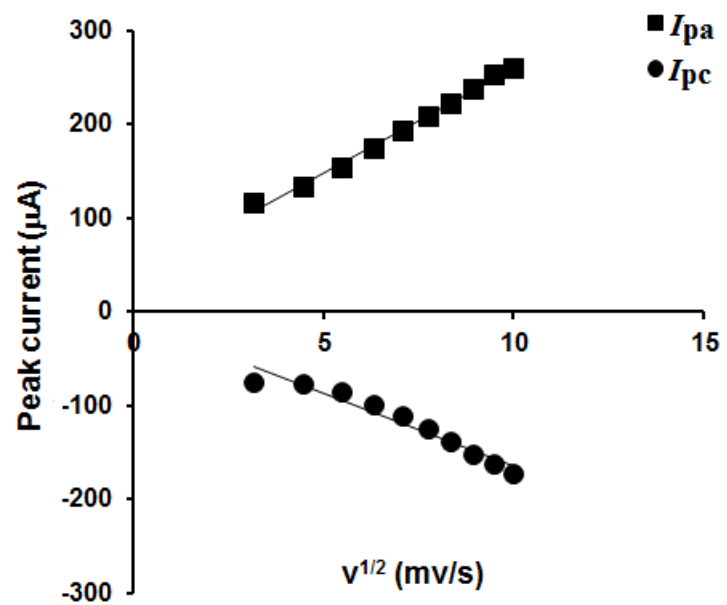

Figure S1: Current response as a function of scan rate.  $I_{pa}$  and  $I_{pc}$  represent anodic and cathodic peak currents, respectively.

## Supplementary Table

Table S1: Comparative representation of analytical parameters for all-solid-state ion selective electrode

| Working electrode  | Solid contact                           | Target Ion                                         | Capacitance of solid contact ( $\mu\text{F}$ ) | Potential drift ( $\mu\text{V/s}$ ) | Charge transfer resistance ( $\Omega$ ) |                                                                | Slope (mV/dec)        | Linear range (M)                             | Ref  |
|--------------------|-----------------------------------------|----------------------------------------------------|------------------------------------------------|-------------------------------------|-----------------------------------------|----------------------------------------------------------------|-----------------------|----------------------------------------------|------|
|                    |                                         |                                                    |                                                |                                     | At solid contact/solution interface     | At (solid contact + Ion selective membrane)/solution interface |                       |                                              |      |
| Glassy carbon disk | PEDOT(PSS)                              | $\text{K}^+$                                       | 162                                            | Not provided                        |                                         | $8 \times 10^5$                                                | Not provided          | $10^{-6} - 10^{-1}$                          | [12] |
| Glassy carbon      | Fullerene Bimodal pore $\text{C}_{60}$  | $\text{Pb}^{+2}$                                   | 90                                             | 11.1                                |                                         | $0.25 \times 10^6$                                             | 28.8                  | $10^{-9} - 10^{-3}$                          | [19] |
| Glassy carbon disk | 7,7,8,8-tetracyanoquinodimethane (TCNQ) | $\text{K}^+$<br>$\text{Na}^+$                      | 132<br>154                                     | 11.1<br>9.2                         | 333<br>425                              |                                                                | 59.24<br>58.68        | $10^{-6.5} - 10^{-1}$<br>$10^{-6} - 10^{-1}$ | [32] |
| Platinum           | Thick polypyrrole (PPy) film            | $\text{Na}^+$                                      | Not provided                                   | $9.23 \times 10^{-3}$               |                                         | $70 \times 10^3$                                               | 55.6<br>56.9          | $10^{-4} - 10^{-1}$                          | [8]  |
| Platinum,          | Poly(3-octylthiophene) (POT)            | $\text{Li}^+$<br>$\text{Ca}^{2+}$<br>$\text{Cl}^-$ | Not provided                                   | Not provided                        |                                         | $4.1 \times 10^6$<br>$6.1 \times 10^6$<br>$0.14 \times 10^6$   | 56.0<br>30.0<br>-62.6 | Not provided                                 | [9]  |
| Glassy             | polyaniline                             | $\text{Li}^+$                                      | Not provided                                   | $9.23 \times 10^{-3}$               | Not                                     |                                                                | 57.8                  | $10^{-3} - 10^{-1}$                          | [10] |

|                  |                                                                    |                  |                         |                         |                 |                        |      |                                      |      |
|------------------|--------------------------------------------------------------------|------------------|-------------------------|-------------------------|-----------------|------------------------|------|--------------------------------------|------|
| carbon           | doped<br>poly(3-<br>octylthiophene)                                | Ca <sup>2+</sup> |                         | 5.78 × 10 <sup>-3</sup> | provided        |                        | 27.0 | 10 <sup>-5</sup> -10 <sup>-1</sup>   |      |
| Gold             | Prussian blue                                                      | K <sup>+</sup>   | Not provided            | Not<br>provided         | Not<br>provided |                        | 42.0 | 10 <sup>-6</sup> -10 <sup>-1</sup>   | [29] |
| Nickel mesh      | three-<br>dimensionally<br>ordered<br>macroporous<br>(3DOM) carbon | K <sup>+</sup>   | Not provided            | 3.25 × 10 <sup>-3</sup> | Not<br>provided |                        | 59.2 | 10 <sup>-6</sup> -10 <sup>-3</sup>   | [16] |
| Copper           | single-walled<br>carbon<br>nanotubes<br>(SWCNTs)                   | K <sup>+</sup>   | 59                      | 85                      |                 | 13.5 × 10 <sup>6</sup> | 58.1 | 10 <sup>-5</sup> -10 <sup>-3</sup>   | [17] |
| Glassy<br>carbon | Fullerene (C <sub>60</sub> )                                       | K <sup>+</sup>   | 1.26 × 10 <sup>-6</sup> | Not<br>provided         | 1728            |                        | 55   | 10 <sup>-4</sup> -10 <sup>-2</sup>   | [18] |
| Glassy<br>carbon | Reduced<br>graphene oxide                                          | K <sup>+</sup>   | 78.1                    | 12.8                    |                 | 8.32 × 10 <sup>6</sup> | 58.4 | 10 <sup>-5.8</sup> -10 <sup>-1</sup> | [20] |
| Glassy<br>carbon | Reduced<br>graphene oxide                                          | Ca <sup>2+</sup> | Not provided            | 2.77 × 10 <sup>-3</sup> | 75.6            |                        | 29.5 | 10 <sup>-5</sup> -10 <sup>-2.5</sup> | [21] |
| Glassy<br>carbon | Graphene sheet                                                     | K <sup>+</sup>   | 91                      | 55                      |                 | 2.4 × 10 <sup>6</sup>  | 59.2 | 10 <sup>-4.5</sup> -10 <sup>-1</sup> | [22] |
| Glassy           | Carbon Black                                                       | K <sup>+</sup>   | 51                      | 4.19 × 10 <sup>-3</sup> | Not             |                        | 59.1 | 10 <sup>-6.5</sup> -10 <sup>-1</sup> | [64] |

---

|                                               |                                                                                 |                 |                     |                         |              |                         |      |                                      |              |
|-----------------------------------------------|---------------------------------------------------------------------------------|-----------------|---------------------|-------------------------|--------------|-------------------------|------|--------------------------------------|--------------|
| carbon disk                                   |                                                                                 |                 |                     |                         | provided     |                         |      |                                      |              |
| Arenethiolate monolayer-protected Au clusters | tetrakis(4-chlorophenyl)borate (TB <sup>-</sup> ) anion doped nanocluster films | K <sup>+</sup>  | 117.6               | 8.5                     |              | 4.52 × 10 <sup>6</sup>  | 58.8 | 10 <sup>-6</sup> -10 <sup>-1</sup>   | [66]         |
| Gold disk                                     | colloid-imprinted mesoporous (CIM) carbon                                       | K <sup>+</sup>  | 1 × 10 <sup>3</sup> | 3.61 × 10 <sup>-4</sup> |              | 360 × 10 <sup>3</sup>   | 59.5 | 10 <sup>-5.2</sup> -10 <sup>-1</sup> | [24]         |
| Porous carbon electrodes (PC)                 | Porous carbon (PC)                                                              | K <sup>+</sup>  | Not provided        | 212                     |              | 12.75 × 10 <sup>6</sup> | 57.9 | 10 <sup>-5</sup> -10 <sup>-2</sup>   | [23]         |
| Microfabricated 30 nm Cr/50 nm Au             | poly(3,4-ethylenedioxythiophene) polystyrene sulfonate (PEDOT:PSS)              | Na <sup>+</sup> | Not provided        | Not provided            | Not provided |                         | 64.2 | 10 <sup>-3</sup> –                   | [36]         |
|                                               |                                                                                 | K <sup>+</sup>  |                     |                         |              |                         | 61.3 | 160 × 10 <sup>-3</sup>               |              |
|                                               |                                                                                 |                 |                     |                         |              |                         |      | 10 <sup>-3</sup> –                   |              |
|                                               |                                                                                 |                 |                     |                         |              |                         |      | 32 × 10 <sup>-3</sup>                |              |
| Carbon-Screen printed                         | Chitosan-PB nanocomposite                                                       | Na <sup>+</sup> | 154                 | 3.61 × 10 <sup>-4</sup> |              | 6.21 × 10 <sup>3</sup>  | 52.4 | 10 <sup>-4</sup> -1                  | Present work |

---

electrode

---
